# Supplementary material for: A novel metal-free ternary core–shell carbon sphere/C3N4/PPy nanocomposite for high-performance supercapacitors
Source: Royal Society of Chemistry journal article supplement (doi:10.1039/d2nj03379h), 2022-01-01
Supplement: d2nj03379h1.pdf [file d2nj03379h1.pdf]

## Supporting Information

### **A novel metal-free ternary core-shell carbon sphere/C<sub>3</sub>N<sub>4</sub>/PPy nanocomposite for high-performance supercapacitor**

Xiaobo Wu,<sup>a</sup> Huiqing Fan,<sup>\*a</sup> Weijia Wang,<sup>a</sup> Lin Lei,<sup>a</sup> and Longtao Ma<sup>\*b</sup>

<sup>a</sup> *State Key Laboratory of Solidification Processing, School of Materials Science and Engineering, Northwestern Polytechnical University, Xi'an, 710072 (P. R. China)*

<sup>b</sup> *Frontiers Science Center for Flexible Electronics, Institute of Flexible Electronics, Northwestern Polytechnical University, Xi'an, 710072 (P. R. China)*

*Corresponding authors: Prof. Huiqing Fan, hqfan@nwpu.edu.cn*

## Electrochemical measurements

The electrochemical measurements were tested by using an electrochemical workstation (CHI660E, CH Instruments, Shanghai, China) in 6.0 M KOH aqueous solution at room temperature.

The working electrode was prepared by mixing the electroactive material, carbon black (super-P-Li) and polymer binder (polyvinylidene difluoride, PTFE) in a weight ratio of 80:10:10. The slurry was pressed onto Ni foam and dried at 120°C for 10 h. The loading mass of electrode material is about 1-3 mg, and the loading amount was confirmed by elaborately weighing the changed weight of Ni foam. The electrochemical measurements were performed by using three electrodes assemble. In the three-electrode cell, the active material electrodes were used as the working electrode, with Pt plate and silver/silver chloride (Ag/AgCl) as the counter and the reference electrode, respectively.

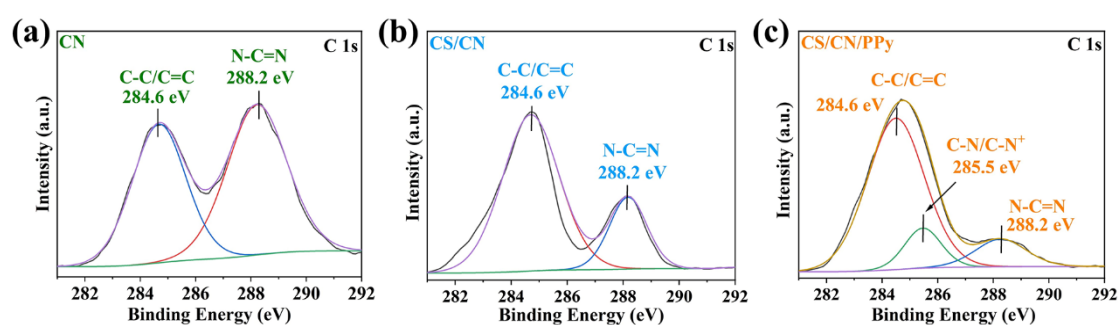

**Fig. S1** C 1s XPS spectra of (a) CN, (b) CS/CN and (c) CS/CN/PPy.

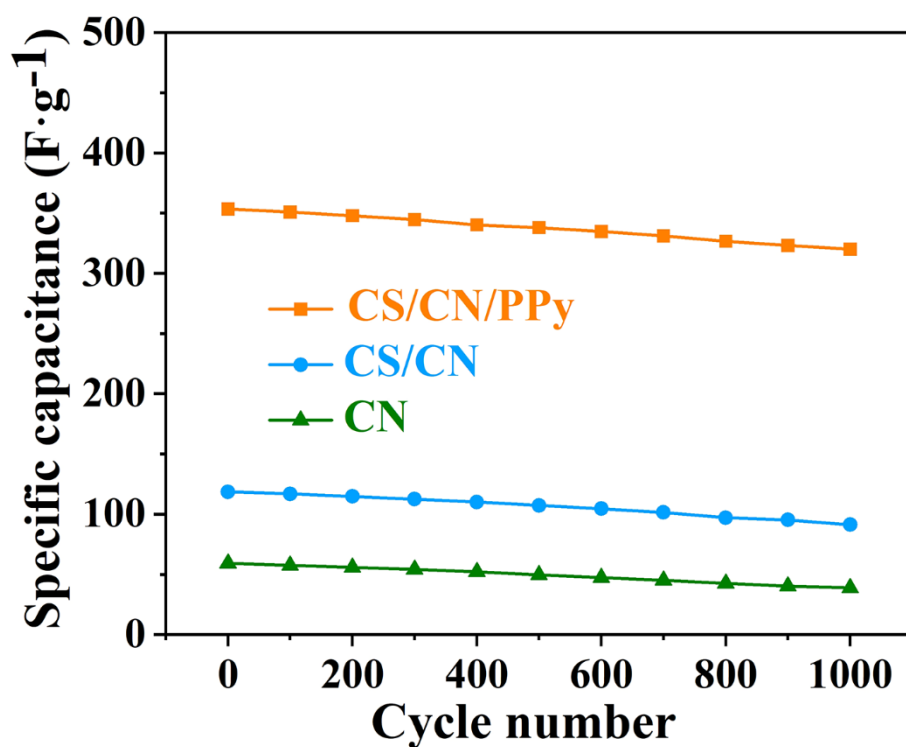

**Fig. S2** The specific capacitance vs cycle number at current density of 1 A·g<sup>-1</sup> of CN, CS/CN and CS/CN/PPy.

**Table S1** The capacitance comparison of different g-C<sub>3</sub>N<sub>4</sub> or PPy-based electrodes composite materials.

| Samples                                                | Current density      | C <sub>sp</sub>      | Ref  |
|--------------------------------------------------------|----------------------|----------------------|------|
|                                                        | (A·g <sup>-1</sup> ) | (F·g <sup>-1</sup> ) |      |
| CS/CN/PPy                                              | 1                    | 353.4                | This |
| MnO <sub>2</sub> /g-C <sub>3</sub> N <sub>4</sub> @PPy | 2                    | 274                  | 1    |
| PCN@PPy-C-900                                          | 5                    | 350                  | 2    |
| g-C <sub>3</sub> N <sub>4</sub> @G                     | 1                    | 264                  | 3    |
| Exfoliated bare C <sub>3</sub> N <sub>4</sub>          | 1                    | 113.7                | 4    |
| g-C <sub>3</sub> N <sub>4</sub> /PPy                   | 1                    | 471                  | 5    |
| GO/PPy                                                 | 1                    | 303                  | 6    |
| CNTs/PPy                                               | 1                    | 282                  | 7    |

## References

- 1 S. Sun, L. Guo, X. Chang, Y. Yu and X. Zhai, *Mater. Lett.*, 2019, **236**, 558-561.
- 2 Q. Li, D. Xu, J. Guo, X. Ou and F. Yan, *Carbon*, 2017, **124**, 599-610.
- 3 Q. Chen, Y. Zhao, X. Huang, N. Chen and L. Qu, *J. Mater. Chem. A*, 2015, **3**, 6761-6766.
- 4 R. Gonçalves, T. M. Lima, M. W. Paixão and E. C. Pereira, *RSC Adv.*, 2018, **8**, 35327-35336.
- 5 G. Dong, H. Fan, K. Fu, L. Ma, S. Zhang, M. Zhang, J. Ma and W. Wang, *Compos.s Part B-Eng.*, 2019, **162**, 369-377.
- 6 L.-Q. Fan, G.-J. Liu, J.-H. Wu, L. Liu, J.-M. Lin and Y.-L. Wei, *Electrochim. Acta*, 2014, **137**, 26-33.
- 7 A. H. P. de Oliveira and H. P. de Oliveira, *J. Power Sources*, 2014, **268**, 45-49.
